# Supplementary material for: Improving the efficiency and stability of inorganic red perovskite light-emitting diodes using traces of zinc ions
Source: Royal Society of Chemistry journal article supplement (doi:10.1039/d1tc03846j), 2021-01-01
Supplement: d1tc03846j1.pdf [file d1tc03846j1.pdf]

## Supporting Information

### Improving the Efficiency and Stability of Inorganic Red Perovskite Light Emitting Diodes by Traces of Zinc Ions

Xiao-Yi Cai,<sup>†1</sup> Yi Yu,<sup>†2</sup> Yong-Chun Ye,<sup>1</sup> Yang Shen,<sup>1</sup> Ming-Lei Guo,<sup>1</sup> Jing-Kun  
Wang,<sup>1</sup> Kong-Chao Shen,<sup>1</sup> Yan-Qing Li,<sup>2,\*</sup> Jian-Xin Tang<sup>1,3\*</sup>

<sup>1</sup> *Institute of Functional Nano & Soft Materials (FUNSOM), Jiangsu Key Laboratory  
for Carbon-Based Functional Materials & Devices, Soochow University, Suzhou  
215123, China, E-mail: jxtang@suda.edu.cn (J.X. Tang)*

<sup>2</sup> *School of Physics and Electronic Science, Ministry of Education Nanophotonics and  
Advanced Instrument Engineering Research Center, East China Normal University,  
Shanghai 200062, China, E-mail: yqli@phy.ecnu.edu.cn (Y.Q. Li)*

<sup>3</sup> *Macao Institute of Materials Science and Engineering, Macau University of Science  
and Technology, Taipa 999078, Macau SAR, China*

<sup>†</sup> These authors contributed equally to this work.

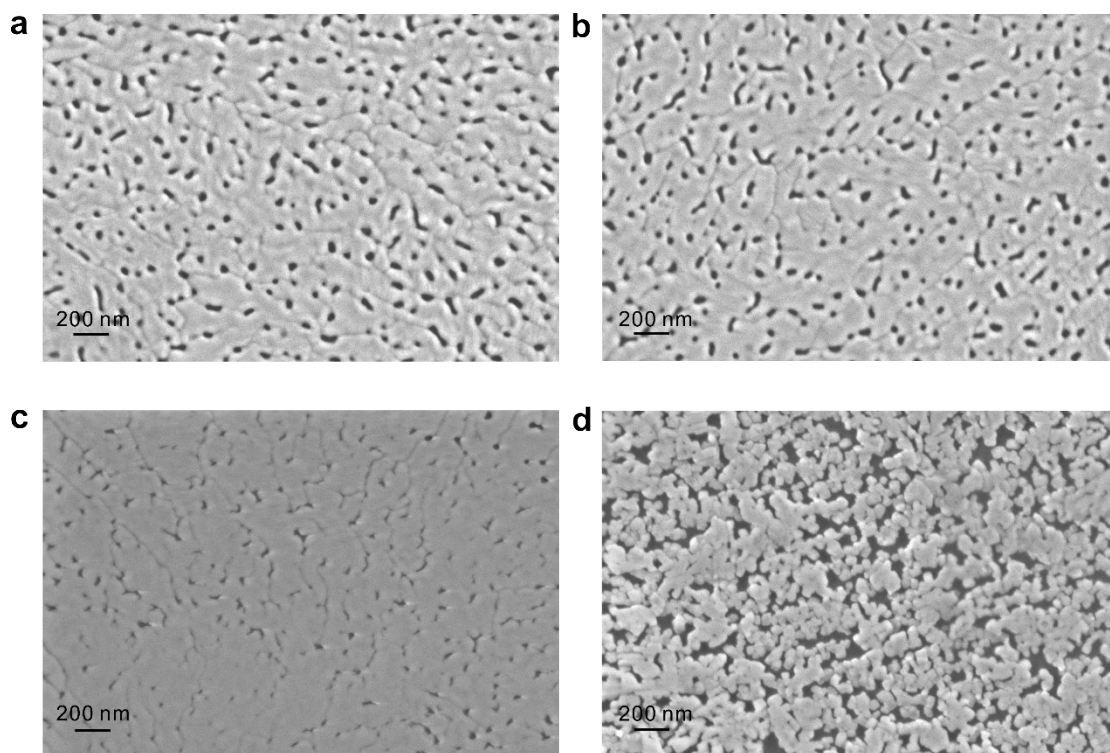

**Figure S1.** SEM images of the prepared  $\text{CsPbI}_{3-x}\text{Br}_x$  films by adding different amounts of  $\text{ZnI}_2$  into the precursor solution. (a) 0.0%, (b) 0.5%, (c) 1.0%, and (d) 1.5% molar ratio of Zn/Pb.

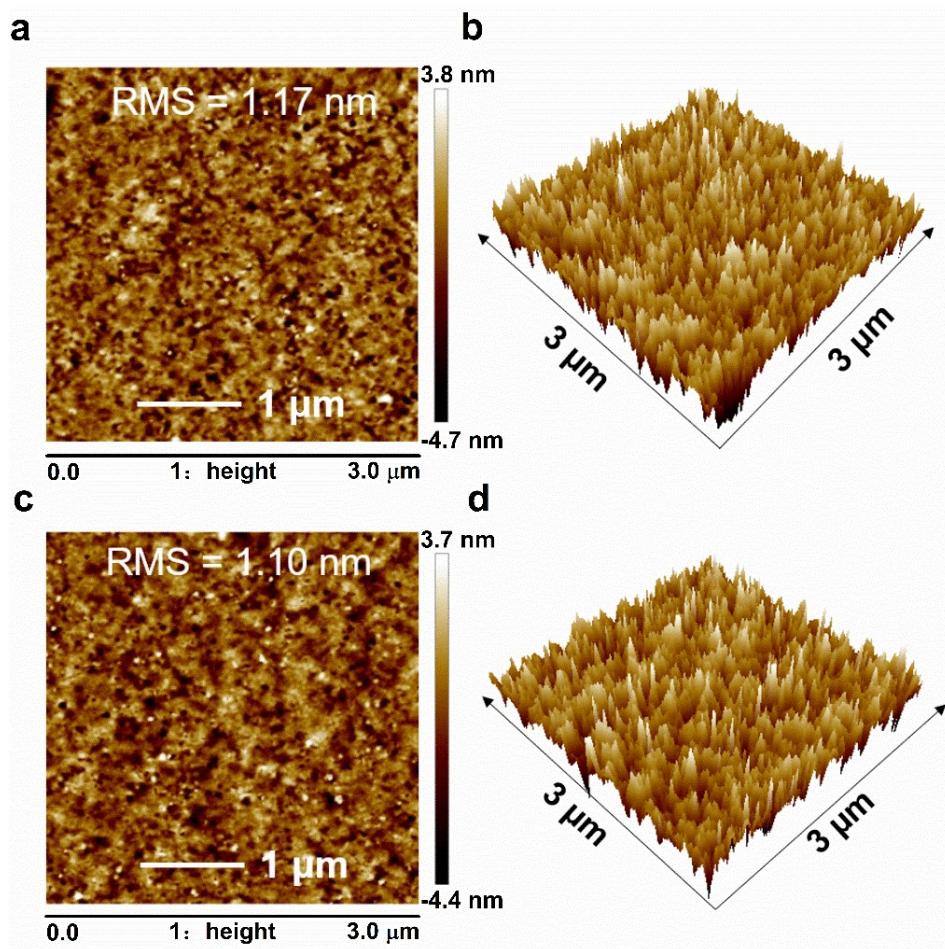

**Figure S2.** AFM images of the prepared perovskite films. Tapping-mode AFM images of the pristine  $\text{CsPbI}_{3-x}\text{Br}_x$  film (a)(b). The film RMS roughness is about 1.17 nm, the scan area is  $3 \mu\text{m} \times 3 \mu\text{m}$ . Tapping-mode AFM images of the  $\text{CsPbI}_{3-x}\text{Br}_x$  thin film incorporating with  $\text{ZnI}_2$  (c)(d). The film RMS roughness is about 1.10 nm, the scan area is  $3 \mu\text{m} \times 3 \mu\text{m}$ .

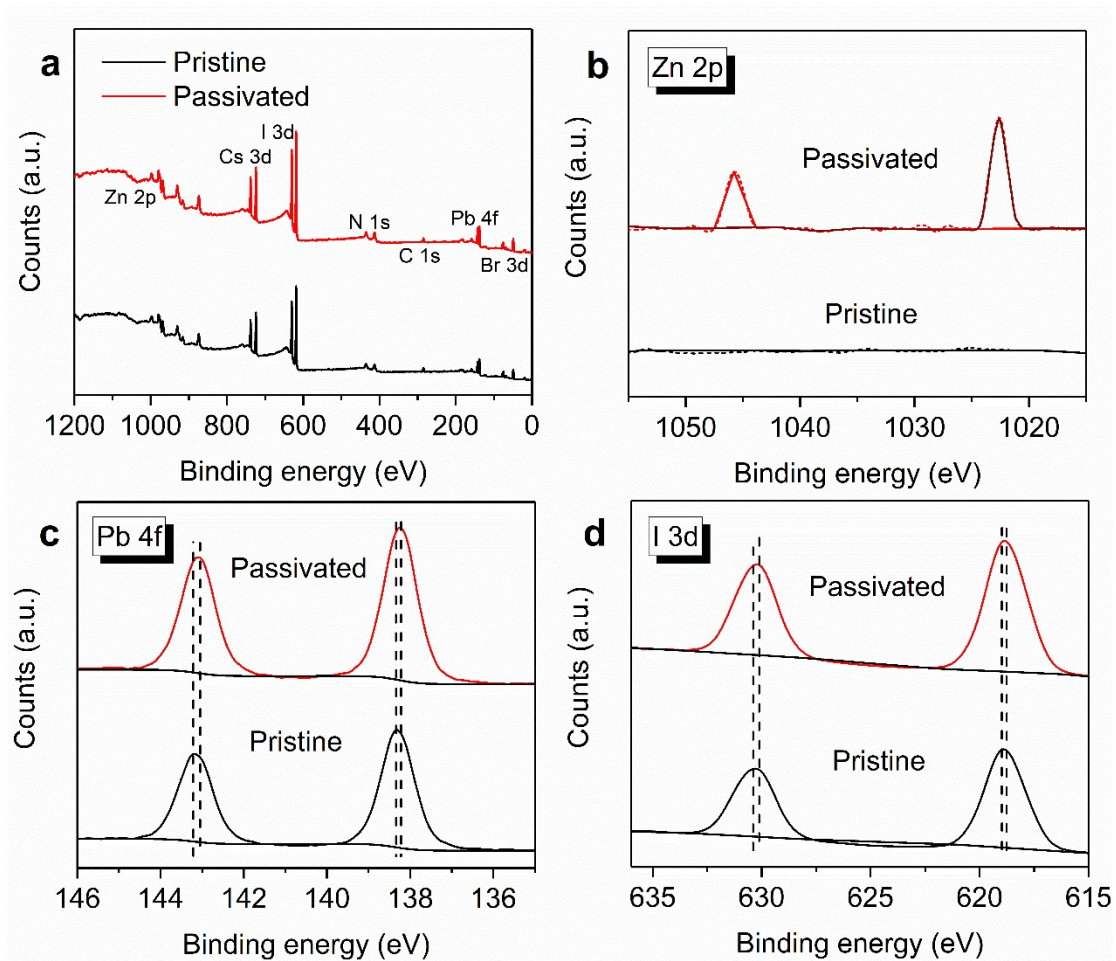

**Figure S3.** (a) XPS spectra of pristine and ZnI<sub>2</sub>-passivated CsPbI<sub>3-x</sub>Br<sub>x</sub> films. XPS analysis of pristine and ZnI<sub>2</sub>-passivated films for (b) Zn 2p, (c) Pb 4f and (d) I 3d.



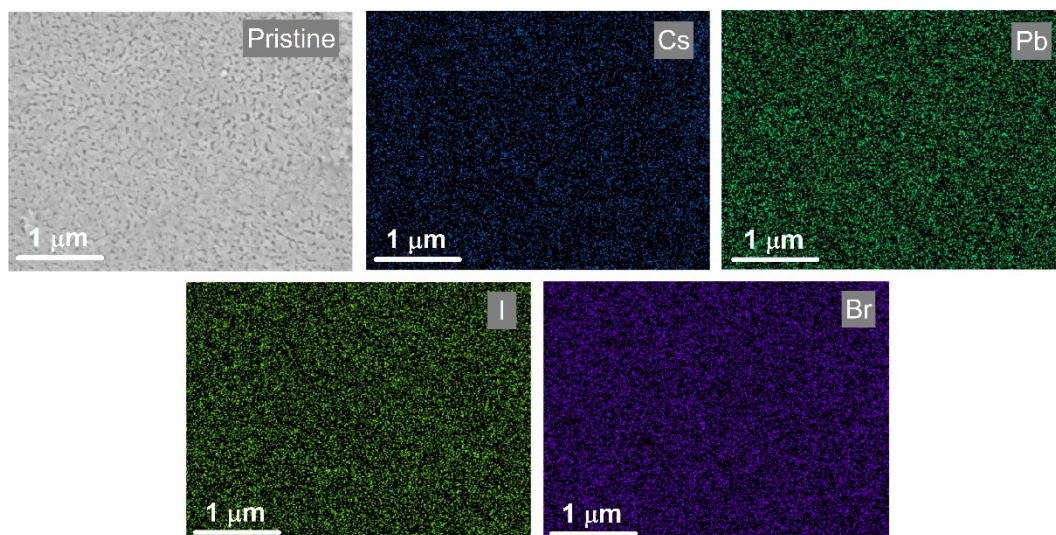

**Figure S4.** SEM image and corresponding elemental mapping images of pristine  $\text{CsPbI}_{3-x}\text{Br}_x$  perovskite thin film. Scale bar: 1  $\mu\text{m}$ .

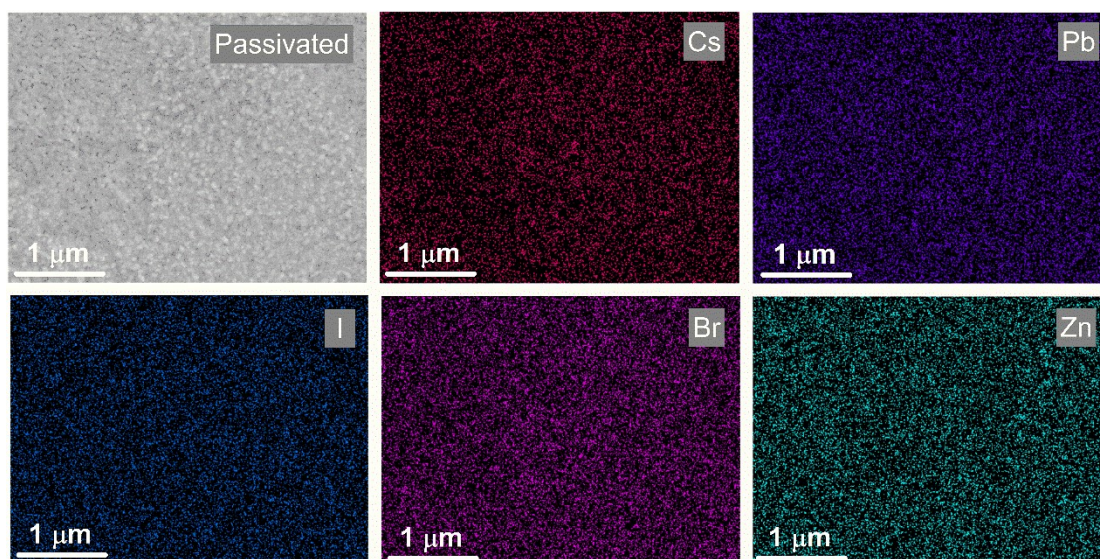

**Figure S5.** SEM image and corresponding elemental mapping images of passivated  $\text{CsPbI}_{3-x}\text{Br}_x$  perovskite thin film. Scale bar: 1  $\mu\text{m}$ .

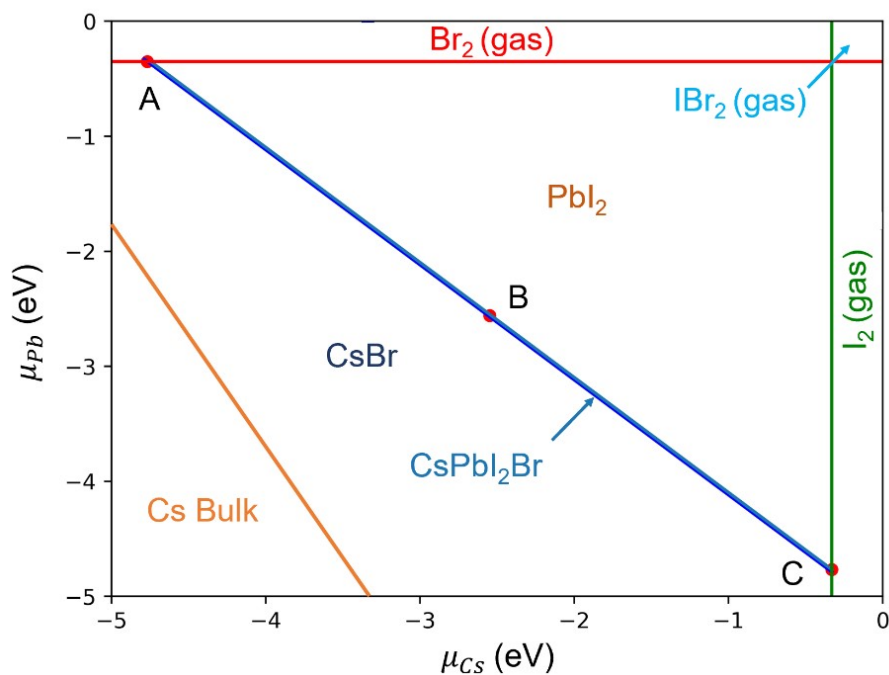

**Figure S6.** Stability regions of various compounds against Cs and Pb chemical potentials in  $CsPbI_2Br$ . The region indicates the available equilibrium chemical potential region for  $CsPbI_2Br$ . Three representative points (A: Br-rich/I-poor, B: moderate, C: I-rich/Br-poor conditions) are selected for the formation energy calculations.

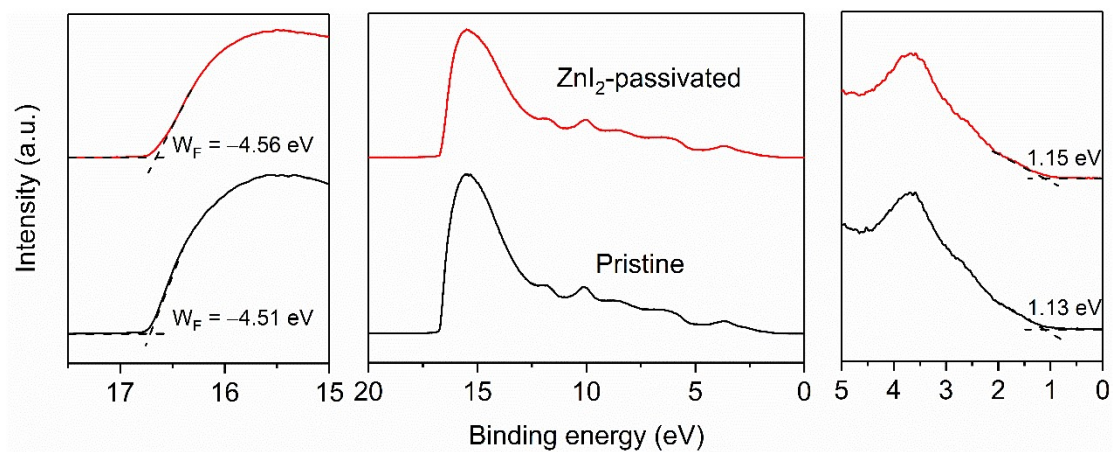

**Figure S7.** UPS spectra of the pristine  $\text{CsPbI}_{3-x}\text{Br}_x$  and  $\text{ZnI}_2$ -passivated  $\text{CsPbI}_{3-x}\text{Br}_x$  films. Their  $W_F$ s are  $-4.51$  eV and  $-4.56$  eV, respectively. Their HOMOs are  $-5.71$  eV and  $-5.64$  eV, respectively.



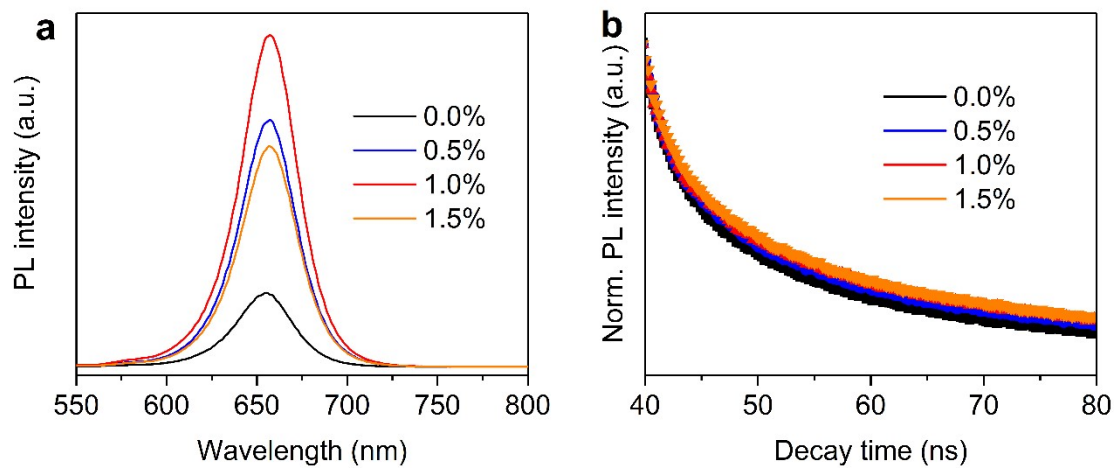

**Figure S8.** PL spectra (a) and TRPL spectra (b) of pristine and ZnI<sub>2</sub>-passivated CsPbI<sub>3-x</sub>Br films with different molar ratio of Zn/Pb on PEDOT:PSS films.

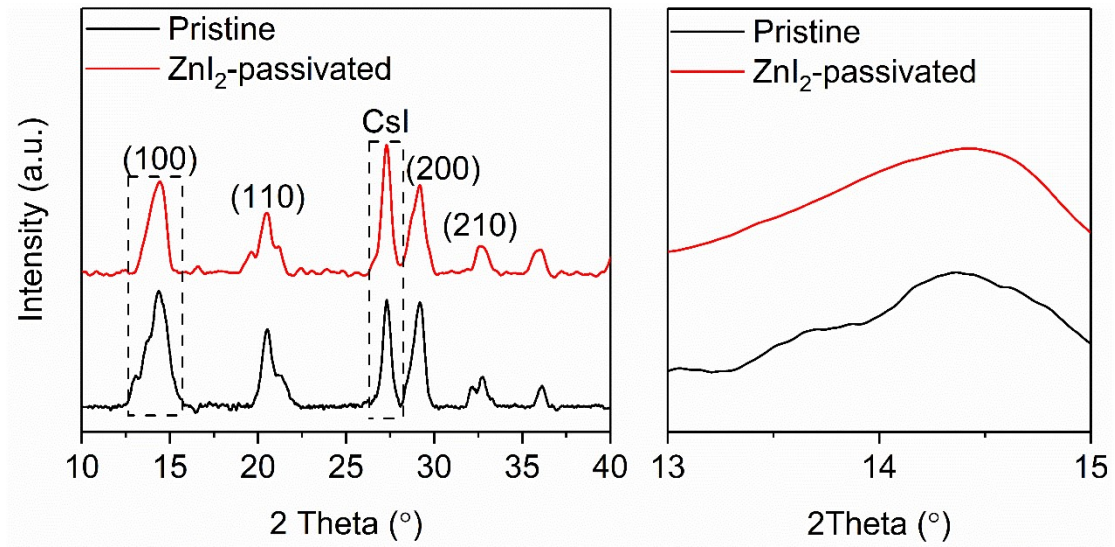

**Figure S9.** Comparison of the perovskite crystallinity. XRD patterns of the CsPbI<sub>3-x</sub>Br<sub>x</sub> films with and without ZnI<sub>2</sub> passivation.

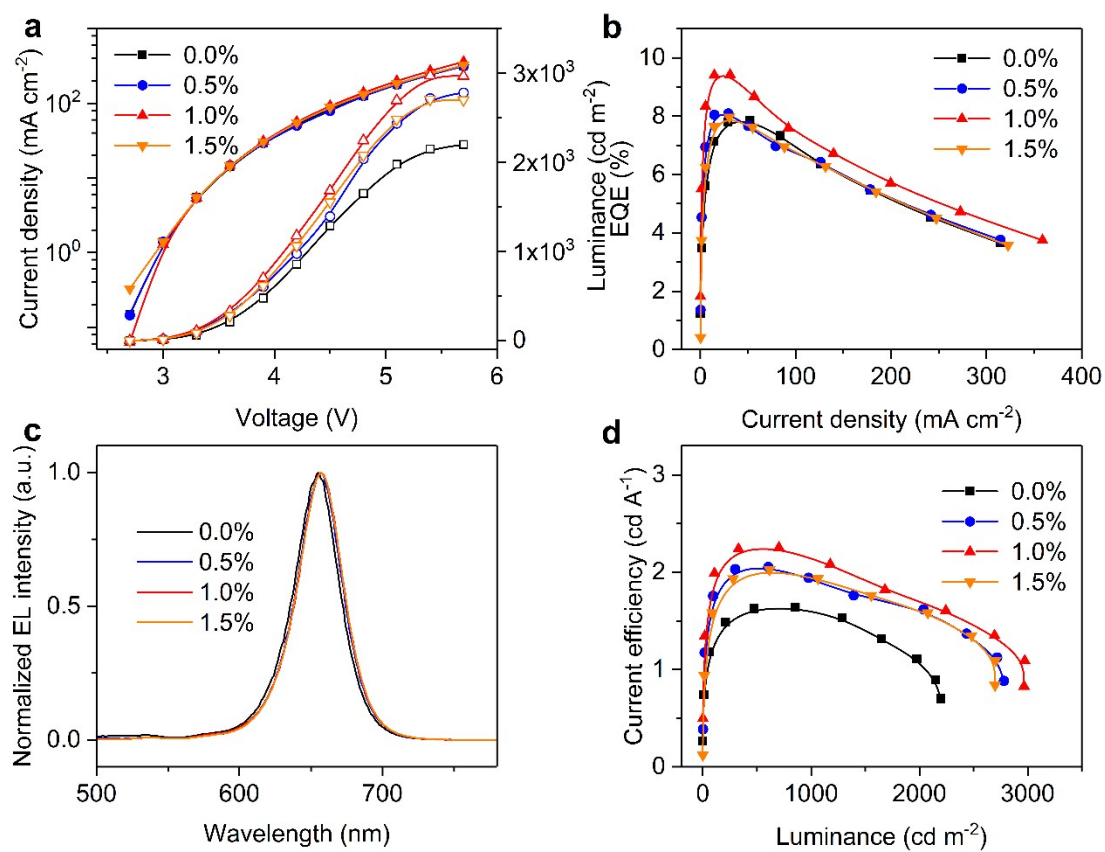

**Figure S10.** (a) J-V-L curves, (b) EQE versus current density curves, (c) EL spectra and (d) CE versus luminance of CsPbI<sub>3-x</sub>Br<sub>x</sub> PeLEDs with different molar ratio of Zn/Pb.

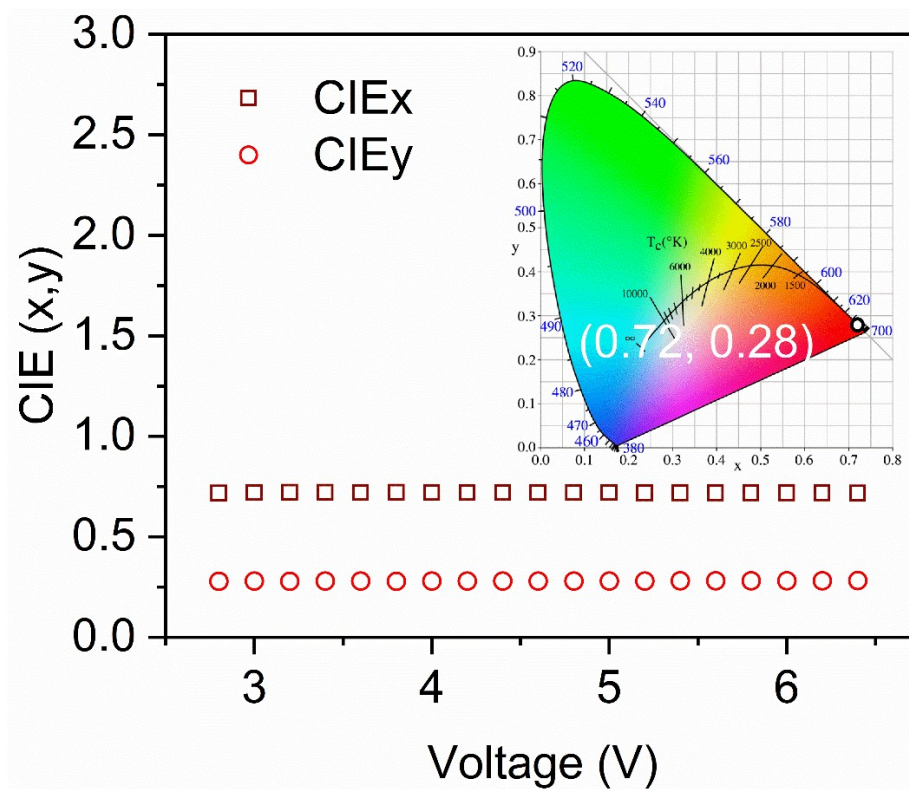

**Figure S11.** CIE coordinates of the  $\text{ZnI}_2$ -passivated  $\text{CsPbI}_{3-x}\text{Br}_x$  PeLEDs under different bias voltages. Inset is CIE color coordinates under an applied voltage of 3.6 V.

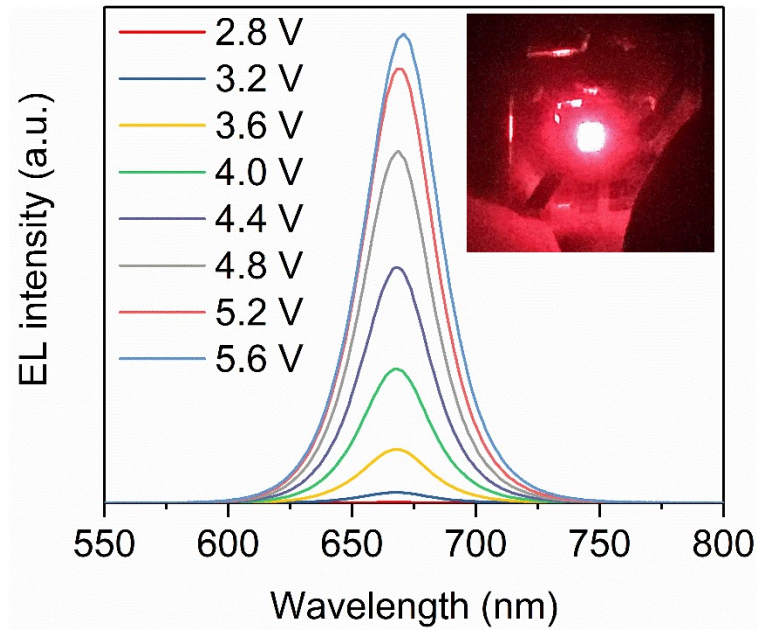

**Figure S12.** EL spectra of the ZnI<sub>2</sub>-passivated CsPbI<sub>3-x</sub>Br<sub>x</sub> based PeLEDs at the bias voltages from 2.8 V to 5.6 V. Inset is a photograph of red emission PeLED operating under 5.4 V forward bias.



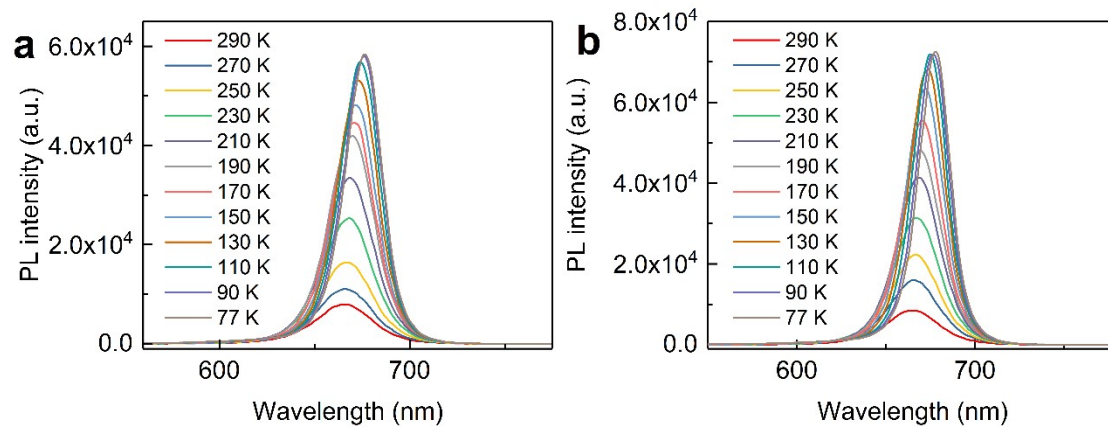

**Figure S13.** Temperature-dependent PL spectra of (a) pristine and (b) passivated  $\text{CsPbI}_{3-x}\text{Br}_x$ .

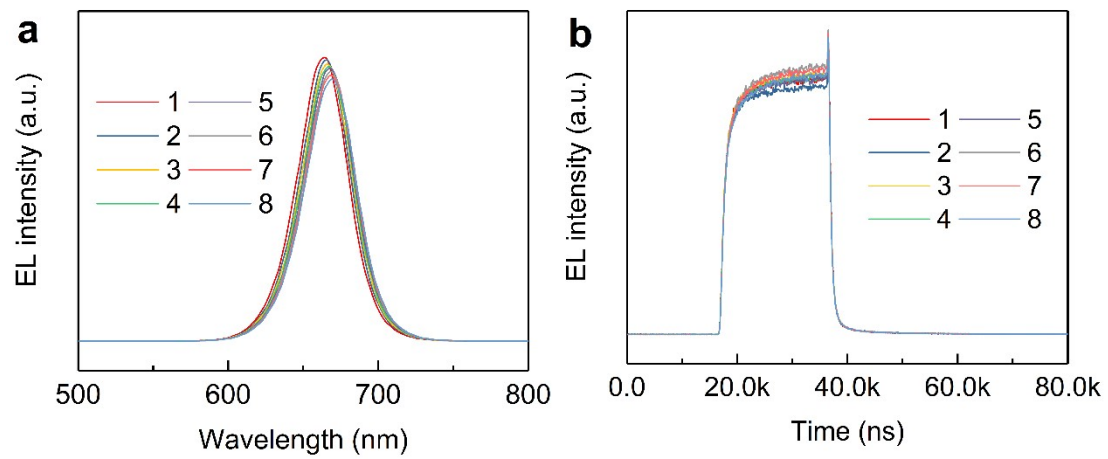

**Figure S14.** (a) Time-dependent EL spectrum and (b) time-dependent TRPL of passivated device. (testing every two minutes)

**Table S1.** Fitting parameters of the PL decay lifetime for the pristine CsPbI<sub>3-x</sub>Br<sub>x</sub> and ZnI<sub>2</sub>-passivated CsPbI<sub>3-x</sub>Br<sub>x</sub> films with different molar ratio of Zn/Pb.

| Perovskite       | $\tau_1$<br>[ns] | $\tau_2$<br>[ns] | $\tau_3$<br>[ns] | $\tau_{ave}$<br>[ns] |
|------------------|------------------|------------------|------------------|----------------------|
| 0.0 % (Pristine) | 4.83             | 30.15            | 146.27           | 75.81                |
| 0.5%             | 5.19             | 33.34            | 168.70           | 96.82                |
| 1.0%             | 5.27             | 33.98            | 167.48           | 100.92               |
| 1.5%             | 4.10             | 26.48            | 142.02           | 94.51                |

**Table S2.** Device performances of red emission PeLEDs based on ZnI<sub>2</sub>-passivated CsPbI<sub>3-x</sub>Br<sub>x</sub> perovskite films.

| Devices                      | V <sub>on</sub><br>[V] | EL peak<br>[nm] | L <sub>max</sub><br>[cd m <sup>-2</sup> ] | EQE <sub>max</sub><br>[%] | CE <sub>max</sub><br>[cd A <sup>-1</sup> ] | T <sub>50</sub> *<br>[h] |
|------------------------------|------------------------|-----------------|-------------------------------------------|---------------------------|--------------------------------------------|--------------------------|
| Pristine                     | 2.75                   | 666             | 2020                                      | 6.94                      | 1.46                                       | 2269.0                   |
| ZnI <sub>2</sub> -passivated | 2.70                   | 666             | 4258                                      | 9.93                      | 2.66                                       | 2667.0                   |

\* The initial luminance is 100 cd m<sup>-2</sup>.

**Table S3.** Calculated formation energies (in eV) for defects in Zn doped CsPbI<sub>2</sub>Br at the three selected points A, B and C in **Figure S6**.

|                        | <b>A</b> | <b>B</b> | <b>C</b> |
|------------------------|----------|----------|----------|
| <b>Cs substitution</b> | 0.84     | 3.060814 | 5.279681 |
| <b>Pb substitution</b> | 4.30     | 2.09     | -0.12    |



**Table S4.** The summarization of the performances of all-inorganic red emission PeLEDs with perovskite NCs or perovskite films emitters (the peak wavelength is from 630 nm to 700 nm).

| Perovskite Material                                                       | Device Structure                                          | Device Performance Parameters |         |                                 |                                   |              | Ref. |
|---------------------------------------------------------------------------|-----------------------------------------------------------|-------------------------------|---------|---------------------------------|-----------------------------------|--------------|------|
|                                                                           |                                                           | EL (nm)                       | EQE (%) | $L_{max}$ (cd m <sup>-2</sup> ) | $\eta_{CE}$ (cd A <sup>-1</sup> ) | $V_{on}$ (V) |      |
| CsPb(Br/I) <sub>3</sub> NCs                                               | ITO/ZnO-PEI /Perovskite NCs/CBP/TCTA/MoO <sub>x</sub> /Au | 648                           | 6.30    | 2216                            | 6.42                              | 1.9          | (1)  |
| NMA <sub>2</sub> Cs <sub>n-1</sub> Pb <sub>n</sub> I <sub>3n+1</sub>      | ITO/ ZnO/ PEIE/Perovskite/ TFB/MoO <sub>x</sub> /Au       | 689                           | 3.7     | 440                             | -                                 | 2.0          | (2)  |
| PBA <sub>2</sub> Cs <sub>n-1</sub> Pb <sub>n</sub> I <sub>3n+1</sub>      | ITO/NiO/TFB/PVK/Perovskite/TP Bi/Ca/Al                    | 683                           | 7.3     | ~100                            | -                                 | ~3.2         | (3)  |
| PEO/ $\alpha$ -CsPbI <sub>3</sub>                                         | ITO/ZnO/PEI/Perovskite/ Poly-TPD/WO <sub>3</sub> /Al      | 695                           | 1.12    | 101                             | -                                 | 4.7          | (4)  |
| CsPbI <sub>3</sub> NCs (IDA-treated)                                      | ITO/PEDOT:PSS/Poly-TPD/ Perovskite NCs/TPBi/LiF/Al        | 688                           | 5.02    | 748                             | -                                 | 4.1          | (5)  |
| CsPb(Br/I) <sub>3</sub> NCs                                               | ITO/PEDOT:PSS/Poly-TPD/ Perovskite NCs/TPBi/Liq/Al        | 645                           | 14.1    | 794                             | 11.6                              | 2.7          | (6)  |
|                                                                           |                                                           | 653                           | 21.3    | 500                             | 10.6                              | 2.8          |      |
| CsPb(Br/I) <sub>3</sub> NCs                                               | ITO/PEDOT:PSS/Poly-TPD/ Perovskite NCs/TPBi/Liq/Al        | 637                           | 3.55    | 2671                            | 2.97                              | 3.6          | (7)  |
| BA <sub>2</sub> Cs <sub>n-1</sub> Pb <sub>n</sub> I <sub>3n+1</sub> / PEO | ITO/PEDOT:PSS/Poly-TPD/ Perovskite/BCP/LiF/Al             | 680                           | 6.23    | 1392                            | 1.71                              | ~2.6         | (8)  |
| NMA <sub>2</sub> Cs <sub>n-1</sub> Pb <sub>n</sub> I <sub>3n+1</sub>      | ITO/ ZnO/ PEIE/ Perovskite/TFB/MoO <sub>x</sub> /Au       | 694                           | 7.3     | 732                             | 0.36                              | 1.9          | (9)  |
| PEOXA/CsPbBr <sub>0.6</sub> I <sub>2.4</sub>                              | ITO/ZnMgO/Perovskite/ Poly-TPD/MoO <sub>3</sub> /Ag       | 668                           | 6.55    | 338                             | 1.36                              | 1.5          | (10) |
| Ag-doped CsPbI <sub>3</sub> NCs                                           | Ag/PEDOT:PSS/Perovskite NCs/TCTA/MoO <sub>3</sub> /Au     | 690                           | 11.2    | 1106                            | -                                 | 2.5          | (11) |
| PBA <sub>2</sub> Cs <sub>n-1</sub> Pb <sub>n</sub> I <sub>3n+1</sub>      | ITO/PEDOT:PSS/Poly-TPD/ PVK/Perovskite/TPBi/LiF/Al        | 664                           | 13.3    | 968                             | -                                 | 2.6          | (12) |
| CsPb <sub>0.64</sub> Zn <sub>0.36</sub> I <sub>3</sub> NCs                | ITO/ZnO/ PEI/Perovskite NCs/TCTA/MoO <sub>3</sub> /Au     | 668                           | 15.1    | 2202                            | -                                 | 2.0          | (13) |
| NEA/ $\alpha$ -CsPbI <sub>3</sub>                                         | ITO/PEDOT:PSS/PVK/ Perovskite/TPBi/LiF/Al                 | 682                           | 8.65    | 210                             | -                                 | 2.8          | (14) |
| CsPb(Br <sub>0.43</sub> I <sub>0.57</sub> ) <sub>3</sub>                  | ITO/PTAA/PEDOT:PSS/ Perovskite/TPBi/LiF/Al                | 664                           | 0.8     | 2765                            | 0.84                              | 2.5          | (15) |
| 4-F-PMAl/ CsPbI <sub>2.8</sub> Br <sub>0.2</sub>                          | ITO/Poly-TPD/Perovskite/ TPBi/LiF/Al                      | 689                           | 18.6    | ~60                             | -                                 | ~3.0         | (16) |

|                                                                                                         |                                          |     |      |      |      |     |              |
|---------------------------------------------------------------------------------------------------------|------------------------------------------|-----|------|------|------|-----|--------------|
| PEA <sub>2</sub> Cs <sub>n-1</sub> Pb <sub>n</sub> I <sub>3n+1</sub><br>(Addition of ZnI <sub>2</sub> ) | ITO/PEDOT:PSS/Perovskite/<br>TPBi/LiF/Al | 666 | 9.93 | 4258 | 2.66 | 2.8 | This<br>work |
|---------------------------------------------------------------------------------------------------------|------------------------------------------|-----|------|------|------|-----|--------------|

### References:

- [1] Zhang, X.; Sun, C.; Zhang, Y.; Wu, H.; Ji, C.; Chuai, Y.; Wang, P.; Wen, S.; Zhang, C.; Yu, W. W., Bright Perovskite Nanocrystal Films for Efficient Light-Emitting Devices. *J. Phys. Chem. Lett.* **2016**, *7*, 4602–4610.
- [2] Zhang, S.; Yi, C.; Wang, N.; Sun, Y.; Zou, W.; Wei, Y.; Cao, Y.; Miao, Y.; Li, R.; Yin, Y.; Zhao, N.; Wang, J.; Huang, W., Efficient Red Perovskite Light-Emitting Diodes Based on Solution-Processed Multiple Quantum Wells. *Adv. Mater.* **2017**, *29*, 1606600.
- [3] Si, J.; Liu, Y.; He, Z.; Du, H.; Du, K.; Chen, D.; Li, J.; Xu, M.; Tian, H.; He, H.; Di, D.; Lin, C.; Cheng, Y.; Wang, J.; Jin, Y., Efficient and High-Color-Purity Light-Emitting Diodes Based on In Situ Grown Films of CsPbX<sub>3</sub> (X = Br, I) Nanoplates with Controlled Thicknesses. *ACS Nano* **2017**, *11*, 11100–11107.
- [4] Jeong, B.; Han, H.; Choi, Y. J.; Cho, S. H.; Kim, E. H.; Lee, S. W.; Kim, J. S.; Park, C.; Kim, D.; Park, C., All-Inorganic CsPbI<sub>3</sub> Perovskite Phase-Stabilized by Poly(ethylene oxide) for Red-Light-Emitting Diodes. *Adv. Funct. Mater.* **2018**, *28*, 1706401.
- [5] Pan, J.; Shang, Y.; Yin, J.; De Bastiani, M.; Peng, W.; Dursun, I.; Sinatra, L.; El-Zohry, A. M.; Hedhili, M. N.; Emwas, A. H.; Mohammed, O. F.; Ning, Z.; Bakr, O. M., Bidentate Ligand-Passivated CsPbI<sub>3</sub> Perovskite Nanocrystals for Stable Near-Unity Photoluminescence Quantum Yield and Efficient Red Light-Emitting Diodes. *J. Am. Chem. Soc.* **2018**, *140*, 562–565.
- [6] Chiba, T.; Hayashi, Y.; Ebe, H.; Hoshi, K.; Sato, J.; Sato, S.; Pu, Y.-J.; Ohisa, S.; Kido, J., Anion-exchange red perovskite quantum dots with ammonium iodine salts for highly efficient light-emitting devices. *Nat. Photonics* **2018**, *12*, 681–687.
- [7] Yang, J. N.; Song, Y.; Yao, J. S.; Wang, K. H.; Wang, J. J.; Zhu, B. S.; Yao, M. M.; Rahman, S. U.; Lan, Y. F.; Fan, F. J.; Yao, H. B., Potassium Bromide Surface Passivation on CsPbI<sub>3-x</sub>Br<sub>x</sub> Nanocrystals for Efficient and Stable Pure Red Perovskite

- Light-Emitting Diodes. *J. Am. Chem. Soc.* **2020**, *142*, 2956–2967.
- [8] Tian, Y.; Zhou, C.; Worku, M.; Wang, X.; Ling, Y.; Gao, H.; Zhou, Y.; Miao, Y.; Guan, J.; Ma, B., Highly Efficient Spectrally Stable Red Perovskite Light-Emitting Diodes. *Adv. Mater.* **2018**, *30*, 1707093.
- [9] Chang, J.; Zhang, S.; Wang, N.; Sun, Y.; Wei, Y.; Li, R.; Yi, C.; Wang, J.; Huang, W., Enhanced Performance of Red Perovskite Light-Emitting Diodes through the Dimensional Tailoring of Perovskite Multiple Quantum Wells. *J. Phys. Chem. Lett.* **2018**, *9*, 881–886.
- [10] Cai, W.; Chen, Z.; Li, Z.; Yan, L.; Zhang, D.; Liu, L.; Xu, Q. H.; Ma, Y.; Huang, F.; Yip, H. L.; Cao, Y., Polymer-Assisted In Situ Growth of All-Inorganic Perovskite Nanocrystal Film for Efficient and Stable Pure-Red Light-Emitting Devices. *ACS Appl. Mater. Interfaces* **2018**, *10*, 42564–42572.
- [11] Lu, M.; Zhang, X.; Bai, X.; Wu, H.; Shen, X.; Zhang, Y.; Zhang, W.; Zheng, W.; Song, H.; Yu, W. W.; Rogach, A. L., Spontaneous Silver Doping and Surface Passivation of CsPbI<sub>3</sub> Perovskite Active Layer Enable Light-Emitting Devices with an External Quantum Efficiency of 11.2. *ACS Energy Lett.* **2018**, *3*, 1571–1577.
- [12] He, Z.; Liu, Y.; Yang, Z.; Li, J.; Cui, J.; Chen, D.; Fang, Z.; He, H.; Ye, Z.; Zhu, H.; Wang, N.; Wang, J.; Jin, Y., High-Efficiency Red Light-Emitting Diodes Based on Multiple Quantum Wells of Phenylbutylammonium-Cesium Lead Iodide Perovskites. *ACS Photonics* **2019**, *6*, 587–594.
- [13] Shen, X.; Zhang, Y.; Kershaw, S. V.; Li, T.; Wang, C.; Zhang, X.; Wang, W.; Li, D.; Wang, Y.; Lu, M.; Zhang, L.; Sun, C.; Zhao, D.; Qin, G.; Bai, X.; Yu, W. W.; Rogach, A. L., Zn-Alloyed CsPbI<sub>3</sub> Nanocrystals for Highly Efficient Perovskite Light-Emitting Devices. *Nano Lett.* **2019**, *19*, 1552–1559.
- [14] Han, B.; Cai, B.; Shan, Q.; Song, J.; Li, J.; Zhang, F.; Chen, J.; Fang, T.; Ji, Q.; Xu, X.; Zeng, H., Stable, Efficient Red Perovskite Light-Emitting Diodes by ( $\alpha$ ,  $\delta$ )-CsPbI<sub>3</sub> Phase Engineering. *Adv. Funct. Mater.* **2018**, *28*, 1804285.
- [15] Guo, S.; Liu, Y. F.; Liu, Y. S.; Feng, J.; Sun, H. B., Improved performance of pure red perovskite light-emitting devices based on CsPb(Br<sub>1-x</sub>I<sub>x</sub>)<sub>3</sub> with variable content of iodine and bromine. *Opt Lett.* **2020**, *45*, 2724–2727.

[16] Cheng, G.; Liu, Y.; Chen, T.; Chen, W.; Fang, Z.; Zhang, J.; Ding, L.; Li, X.; Shi, T.; Xiao, Z., Efficient All-Inorganic Perovskite Light-Emitting Diodes with Improved Operation Stability. *ACS Appl. Mater. Interfaces* **2020**, *12*, 18084–18090.
